# Supplementary material for: Temporal trends in heart failure medication prescription in a population-based cohort study
Source: HighWire-hosted journal article supplement (doi:10.1136/bmjopen-2020-043290), 2021-03-01

**Supplemental material****Figure S1 - study flow diagram**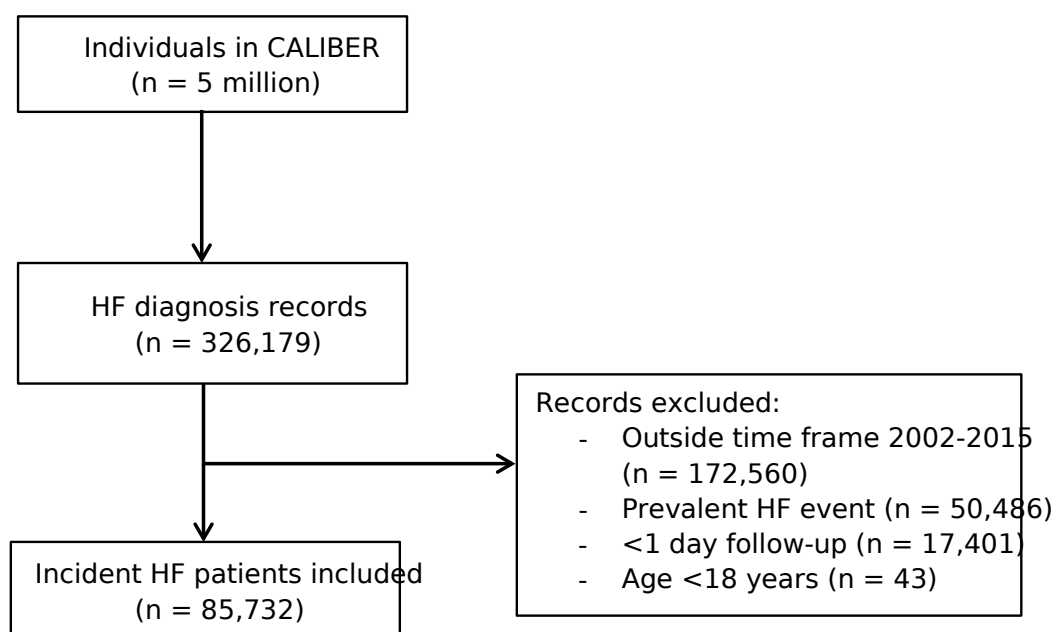

Supplement: bmjopen-2020-043290supp002_data_supplement.pdf [file bmjopen-2020-043290supp002_data_supplement.pdf]
